# Supplementary material
Source: PubMed Central journal article supplement (PMC1779993)
Supplement: tjp0572-0789-Supplementary-figure-3.pdf [file tjp0572-0789-Supplementary-figure-3.pdf]

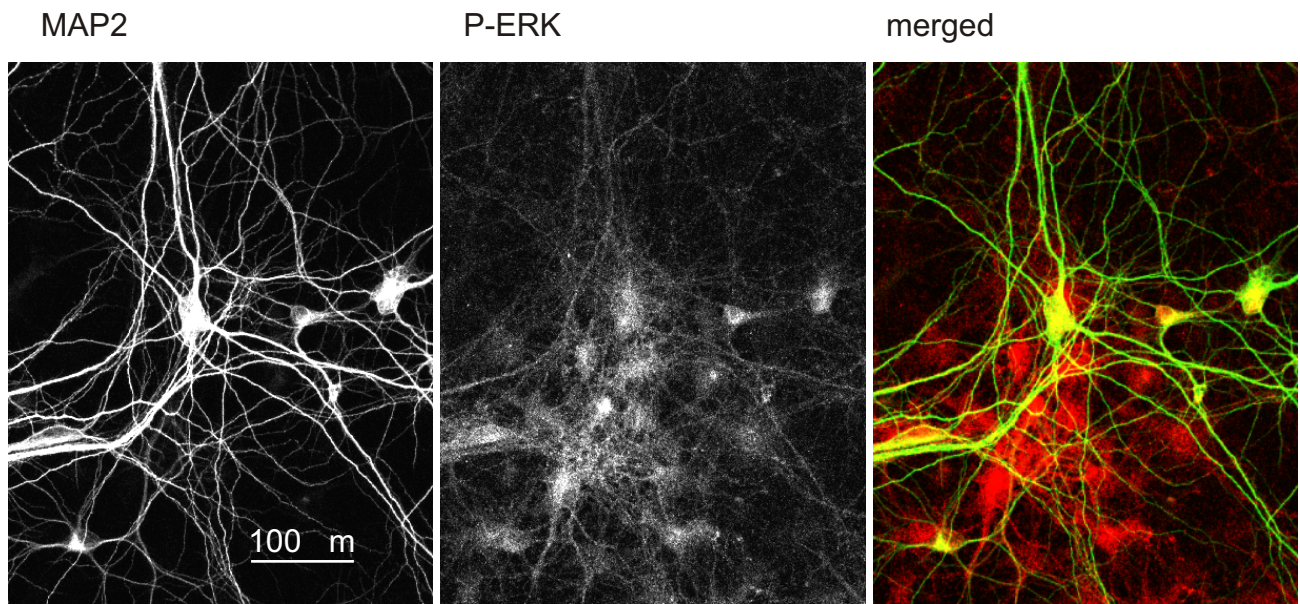

**Supplementary Fig. 3** .Example of image with elevated P-ERK immunoreactivity in non-neuronal cells
